# Supplementary material for: Abscisic acid promotes jasmonic acid biosynthesis via a ‘SAPK10‐bZIP72‐AOC’ pathway to synergistically inhibit seed germination in rice (Oryza sativa)
Source: PubMed Central journal article supplement (PMC7689938; doi:10.1111/nph.16774), 2020-07-28
Supplement: NPH-228-1336-s001.pdf [file NPH-228-1336-s001.pdf]

## New Phytologist Supporting Information

Article title: Abscisic acid promotes jasmonic acid biosynthesis *via* a “SAPK10-bZIP72-AOC” pathway to synergistically inhibit seed germination in rice (*Oryza sativa* L.)

Authors: Yifeng Wang, Yuxuan Hou, Jiehua Qiu, Huimei Wang, Shuang Wang<sup>1</sup>, Liqun Tang, Xiaohong Tong, Jian Zhang

Article acceptance date: 15 June 2020

The following Supporting Information is available for this article:

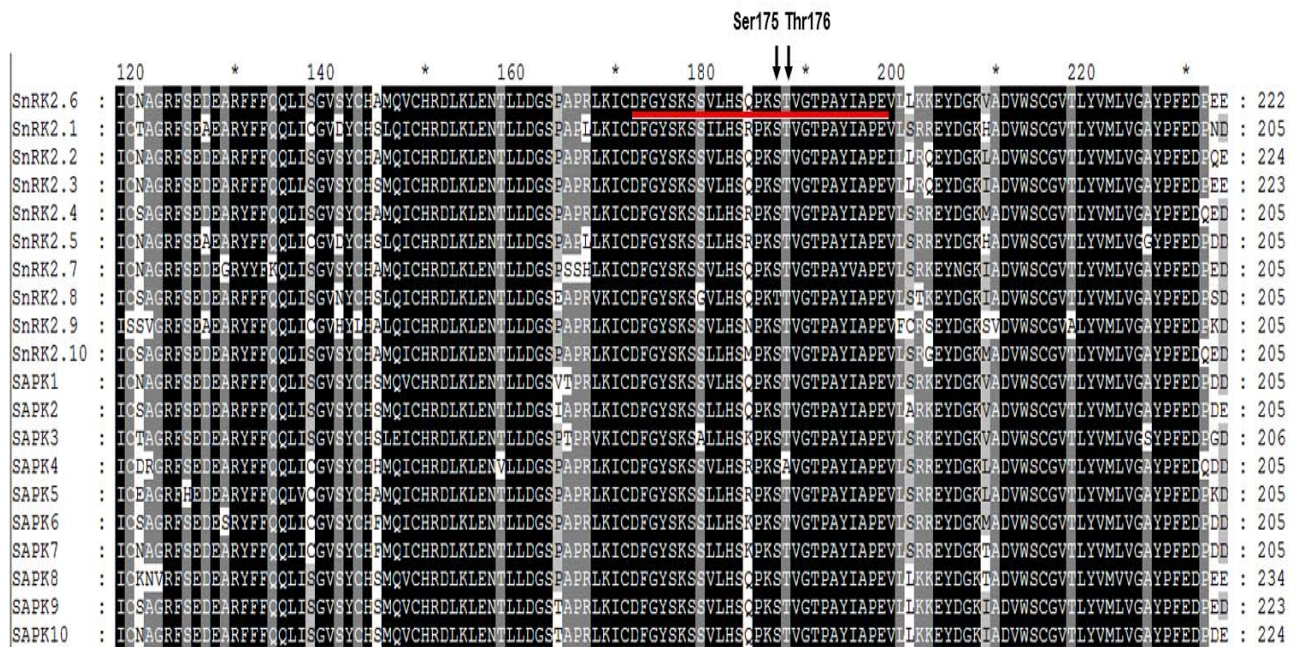

**Fig. S1** Sequence alignment of T- loop region of 10 *Arabidopsis* and 10 Rice SnRK2 family members. Arrows indicate the residues of SnRK2.6 (OST1) phosphorylation sites. The putative T- loop predicted for SnRK2.6 is underlined in red.

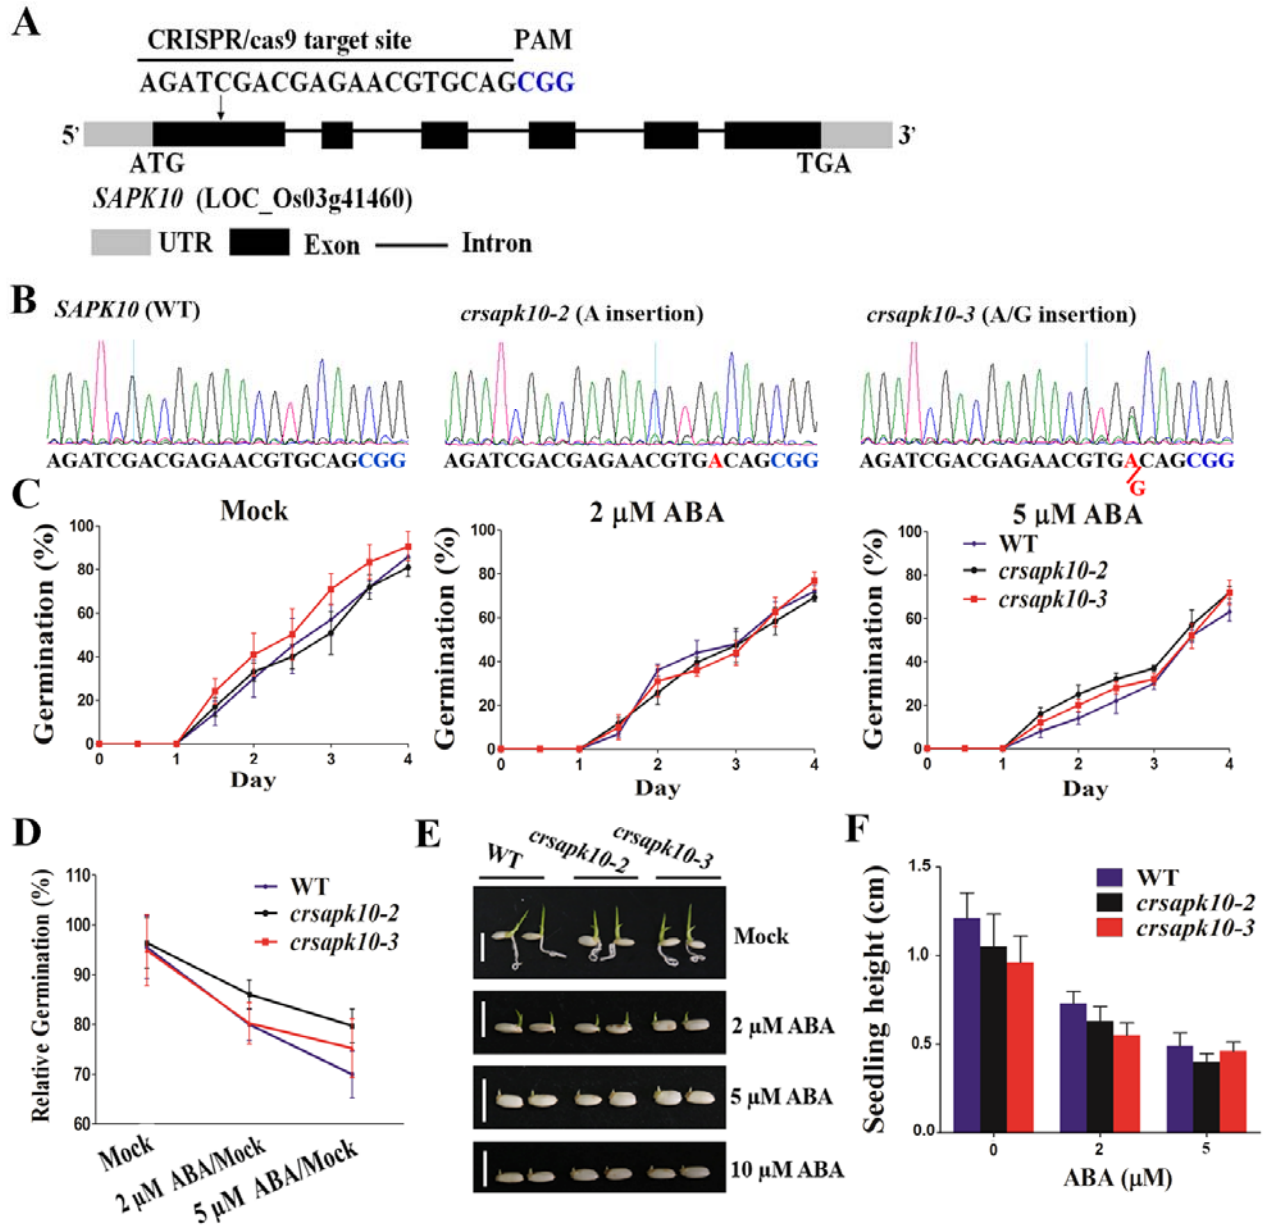

**Fig. S2** Molecular characterization of *sapk10* mutant and seed germination in response to ABA. (A) Schematic presentation of the gene structure of *SAPK10* and CRISPR-cas9 editing site. Grey boxes: untranslated regions; Black boxes: exons; black line: intron. PAM: protospacer adjacent motif. (B) Sanger sequencing chromatograph of the CRISPR-cas9 target site in homozygous mutants of *crsapk10*. The letter in red represented the mutant sites. The letter in blue represented the PAM sequence. (C) Germination time courses of WT and *crsapk10* lines grown on half-strength MS medium containing different concentration of ABA (0, 2, 5  $\mu$ M), respectively. (D) The relative germination of the WT and *crsapk10*

seeds under ABA treatments were determined after 4 days and expressed as a percentage of those grown on Mock condition. (E) Germination phenotypes of WT and *crsapk10* treated with 0, 2, 5  $\mu$ M ABA, respectively. Photographs were taken on day 4. Bar=1cm. (F) Seedling heights of WT and *crsapk10* in accordance to (E). Error bars indicate SD with biological triplicates (n=3, each replicates containing 50 seeds) in (C) and 50 biological replicates (n=50) in (F).

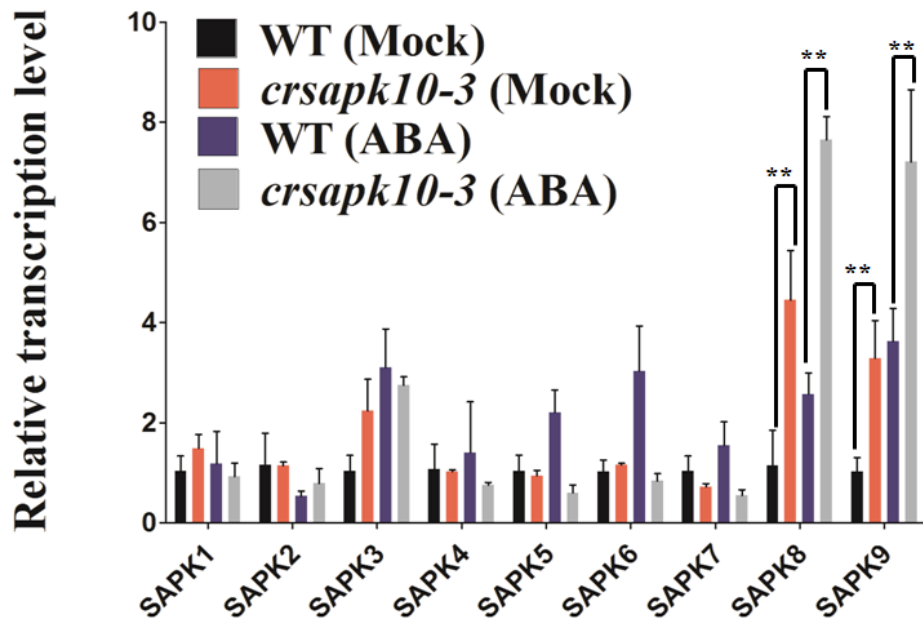

**Fig. S3** qRT-PCR analysis for transcript accumulation of nine SnRK2 family members (*SAPK1-SAPK9*) in the seeds of WT or *crsapk10* lines, respectively. Seeds were grown on mock or 10  $\mu$ M ABA treated half-strength MS medium for 6 hours before harvest for total RNA isolation. Error bars indicate SD with biological triplicates (n=3). Asterisks indicate the significance of differences between the WT and transgenic lines as determined by Student's *t*-test analysis: \*\* P<0.01.

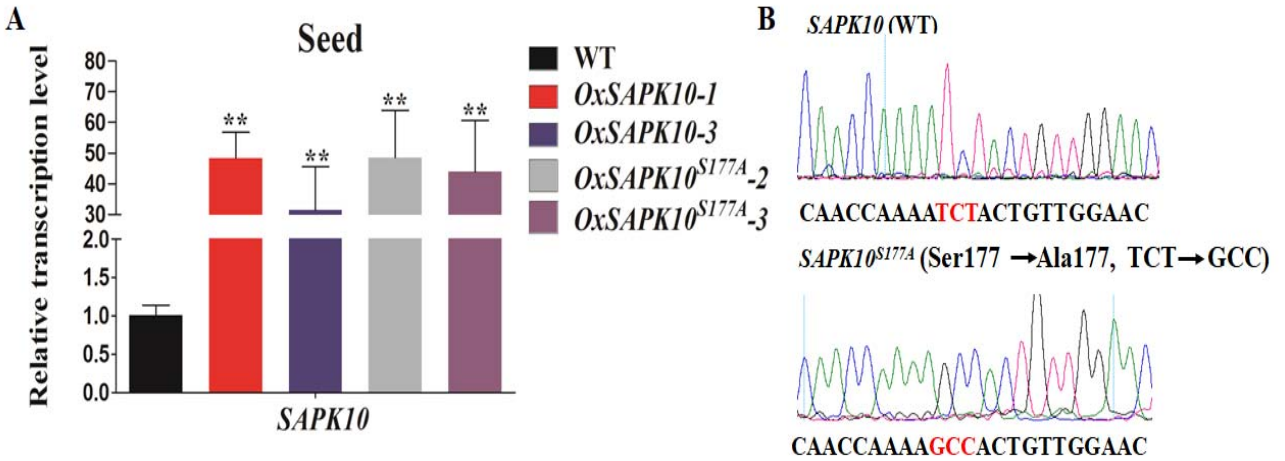

**Fig. S4** Molecular characterization of *SAPK10*, *SAPK10<sup>S177A</sup>* over-expressing transgenic lines. (A) qRT-PCR analysis for transcript accumulation of *SAK10* in the seeds of *OxSAPK10* or *OxSAPK10<sup>S177A</sup>* transgenic lines, respectively. Seeds were grown on half-strength MS medium for 6 hours before harvest for total RNA isolation. Error bars indicate SD with biological triplicates (n=3). Asterisks indicate the significance of differences between the WT and transgenic lines as determined by Student's *t*-test analysis: \*\* P<0.01. (B) Sanger sequencing chromatograph of the mutated *SAPK10* cDNA in *OxSAPK10<sup>S177A</sup>* transgenic lines. The letter in red represented the mutant sites.



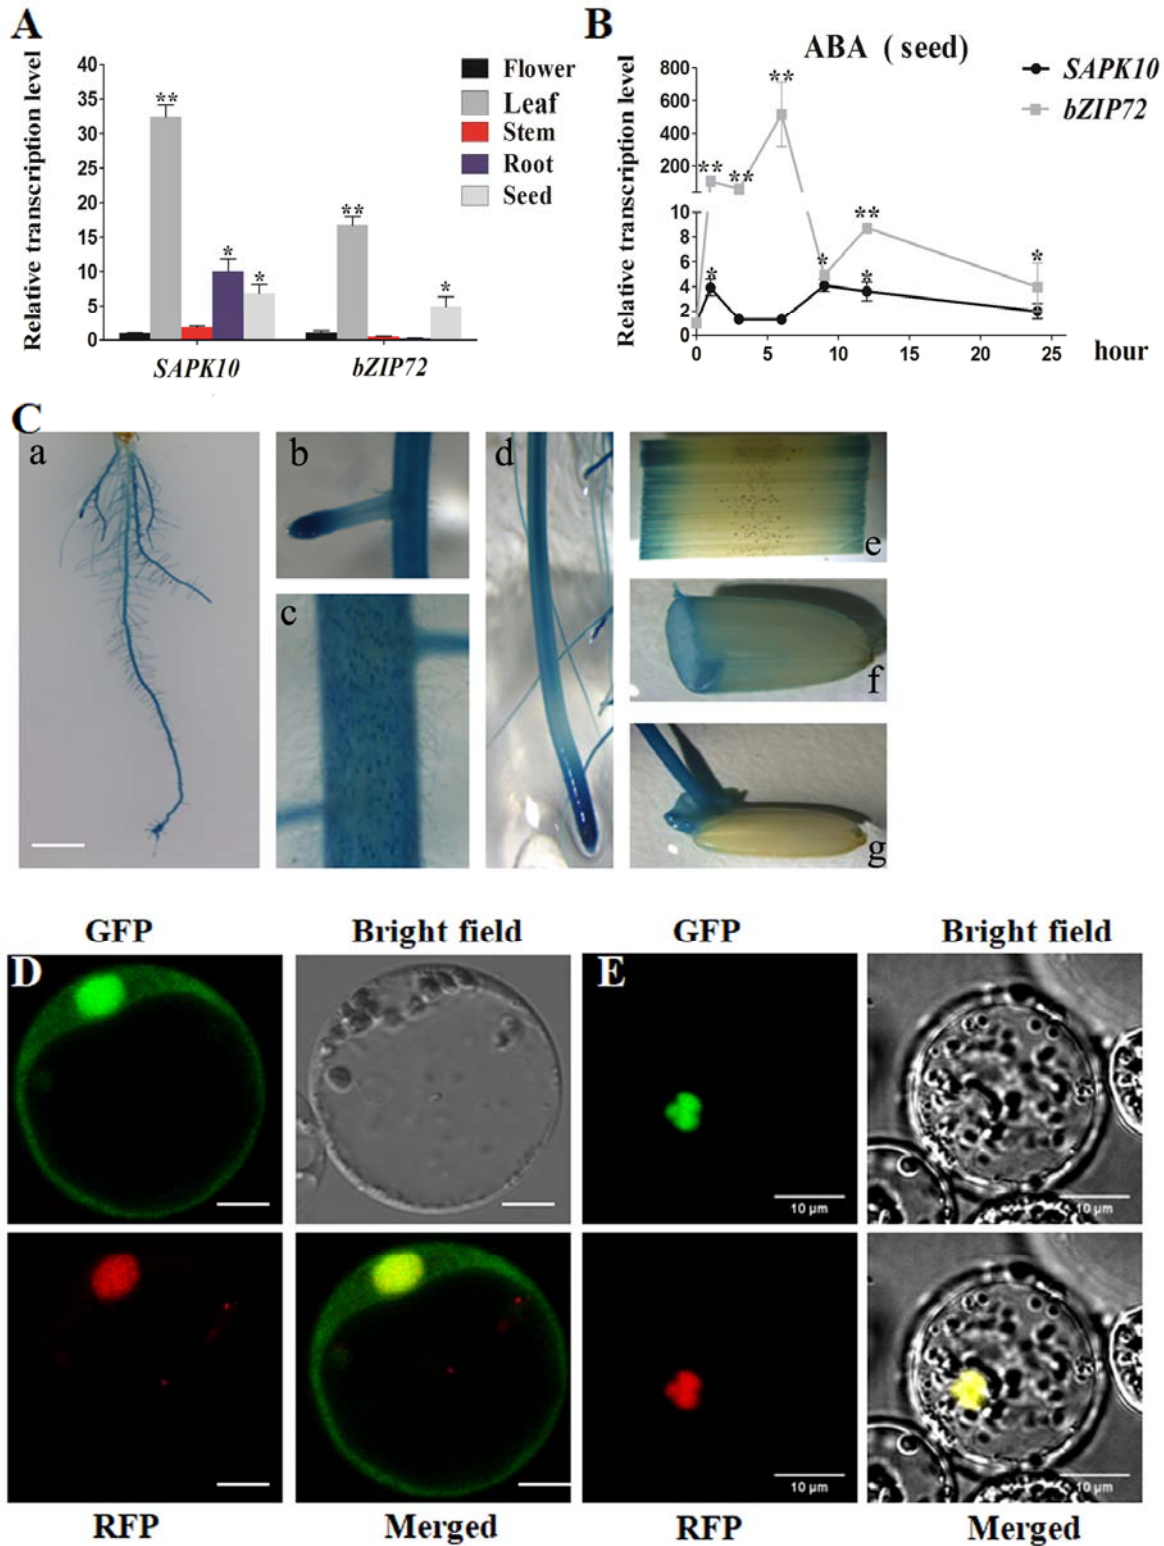

**Fig. S5** Expression pattern of *SAPK10* and *bZIP72*. (A) qRT-PCR analysis of *SAPK10* and *bZIP72* transcription level in flower, leaf, stem, root and seed, respectively. (B) qRT-PCR

analysis of *SAPK10* and *bZIP72* during seeds germination grown on half-strength MS medium treated with 10  $\mu$ M ABA. (C) GUS staining of the primary root (a), lateral roots (b), root hairs (c), crown root (d), leaf (e), seed (f) and plumule (g) of the transgenic plants harboring the *proSAPK10:GUS* fused gene. Bar =1 cm in (a). (D and E) Subcellular localization of SAPK10 in (D) and bZIP72 in (E). *35S:SAPK10-GFP* or *35S:bZIP72-GFP* was co-transformed with a nuclear marker *35S:D53-mKate* (Zhou *et al.*, 2016) into protoplast. Bar=10  $\mu$ m. Error bars indicate SD with biological triplicates (n=3) in (A and B). Asterisks indicate the significance of differences between the WT and transgenic lines as determined by Student's *t-test* analysis: \* P<0.05, \*\* P<0.01.

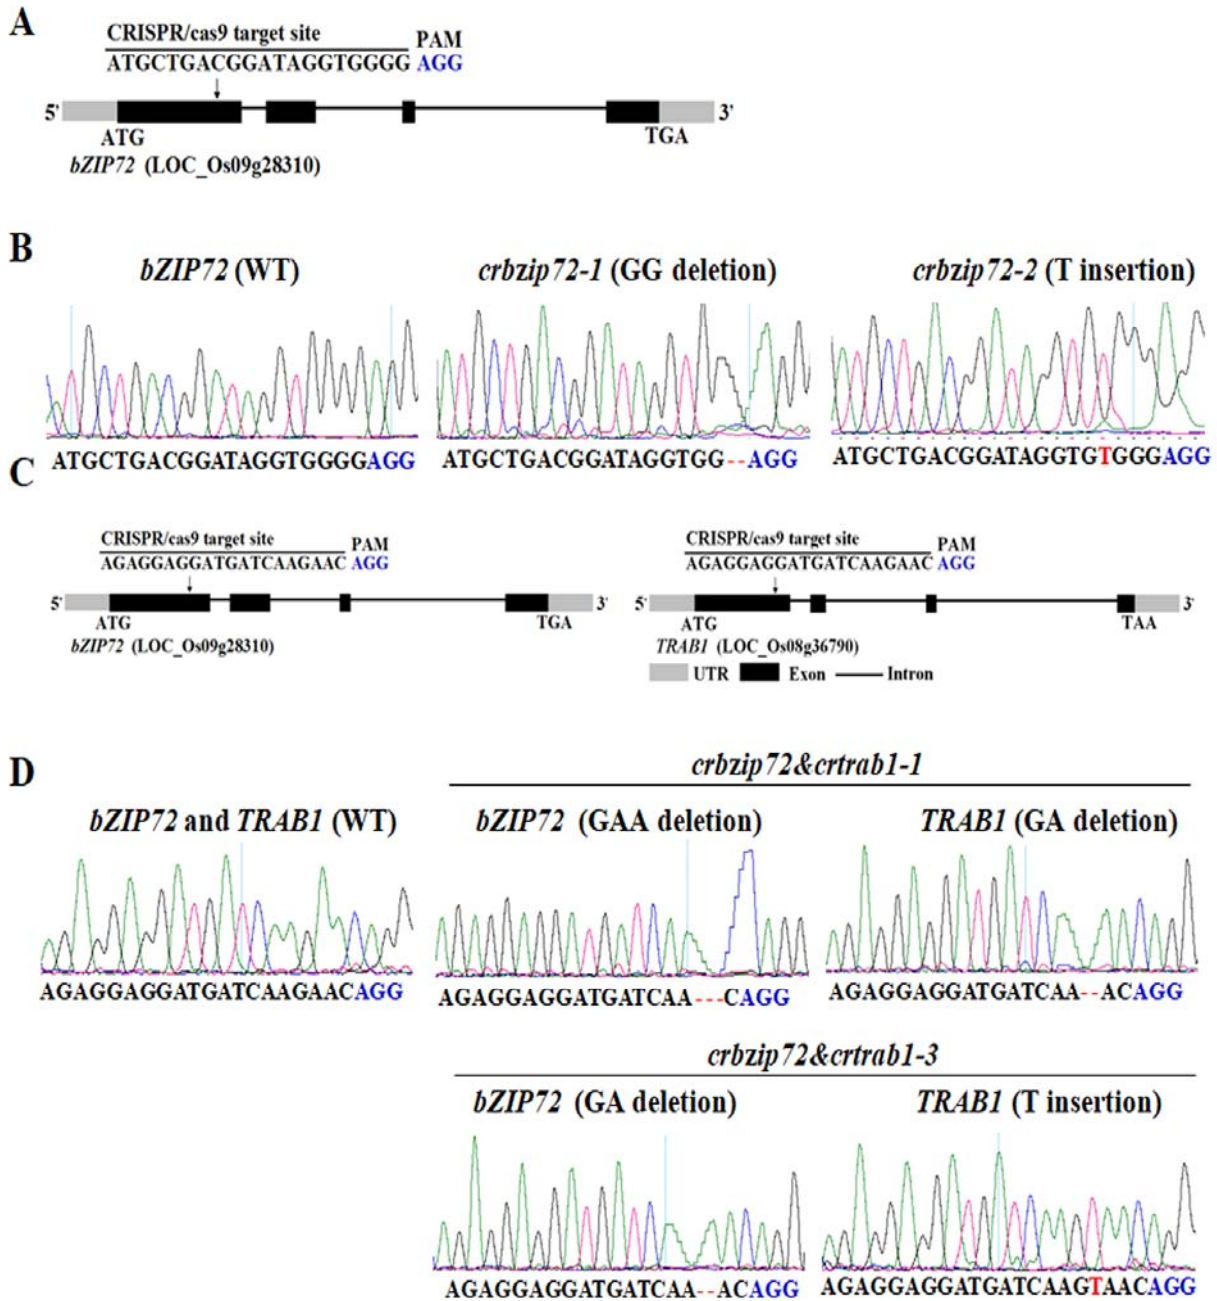

**Fig. S6** Molecular characterization of *crbzip72*, *crtrab1* and *crbzip72/crtrab1* mutant. (A) Schematic presentation of the gene structure of *bZIP72* and CRISPR-cas9 editing site. PAM: protospacer adjacent motif. Grey boxes: untranslated regions; Black boxes: exons; black line: intron. (B) Sanger sequencing chromatograph of the CRISPR-cas9 target site in homozygous mutants of *crbzip72*. The letter in red represented the mutant sites. The letter in blue represented the PAM sequence. (C) Schematic presentation of the gene structure of *bZIP72* and *TRAB1*. Both genes shared the same CRISPR-cas9 editing PAM sequence. (D)

Sanger sequencing chromatograph of the CRISPR-cas9 target site in homozygous mutants of *crbzip72/crtrab1*.

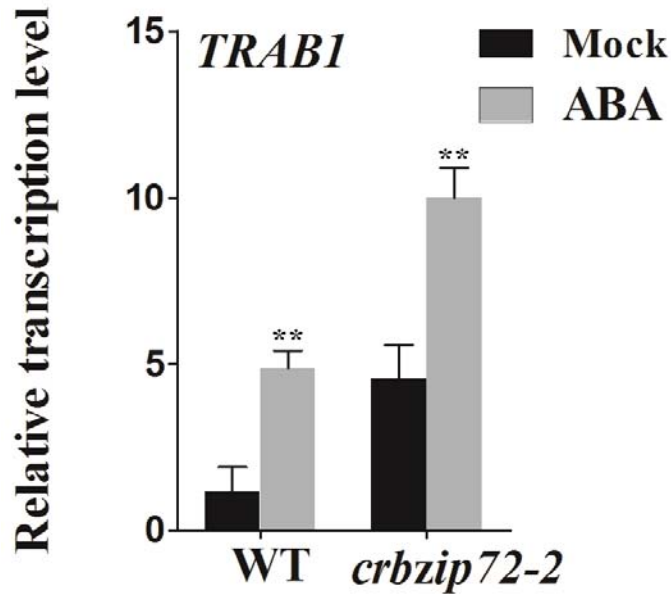

**Fig. S7** qRT-PCR analysis for transcript accumulation of *TRAB1* in the seeds of *crbzip72* transgenic line. Seeds were grown on half-strength MS medium for 6 hours before harvest for total RNA isolation. Error bars indicate SD with biological triplicates (n=3). Asterisks indicate the significance of differences between the WT and transgenic lines as determined by Student's *t*-test analysis: \*\* P<0.01.

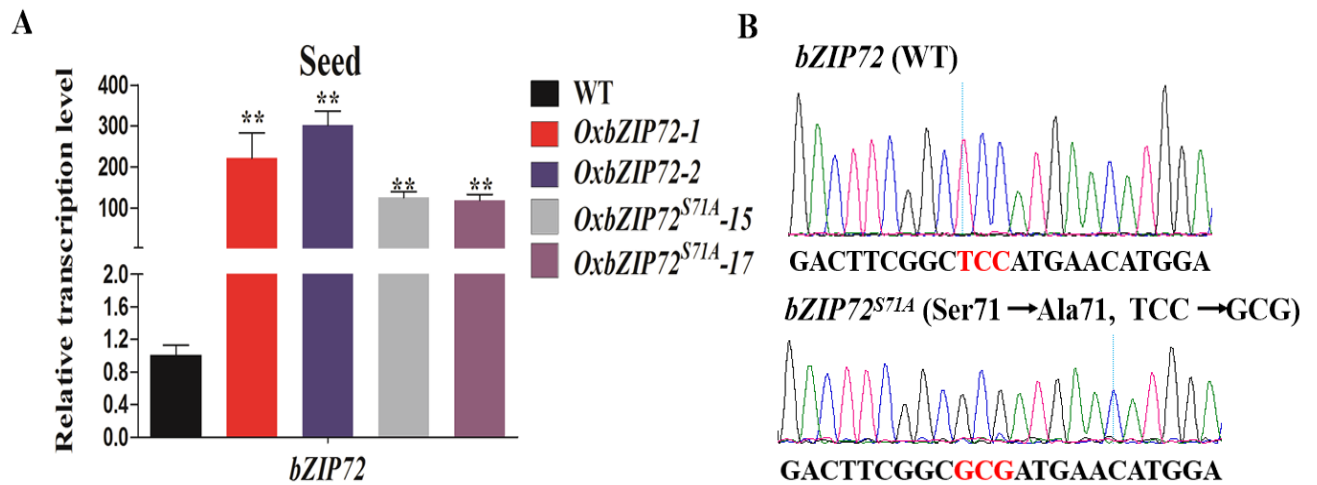



**Fig. S8** Molecular characterization of *bZIP72* and *bZIP72<sup>S71A</sup>* over-expressing transgenic lines. (A) qRT-PCR analysis for transcript accumulation of *bZIP72* in the seeds of *OxbZIP72* and *OxbZIP72<sup>S71A</sup>* transgenic lines, respectively. Seeds were grown on half-strength MS medium for 6 hours before harvest for total RNA isolation. Error bars indicate SD with biological triplicates (n=3). Asterisks indicate the significance of differences between the WT and transgenic lines as determined by Student's *t*-test analysis: \*\* P<0.01. (B) Sanger sequencing chromatograph of the mutated *bZIP72* cDNA in *OxbZIP72<sup>S71A</sup>* transgenic lines. The letter in red represented the mutant sites.

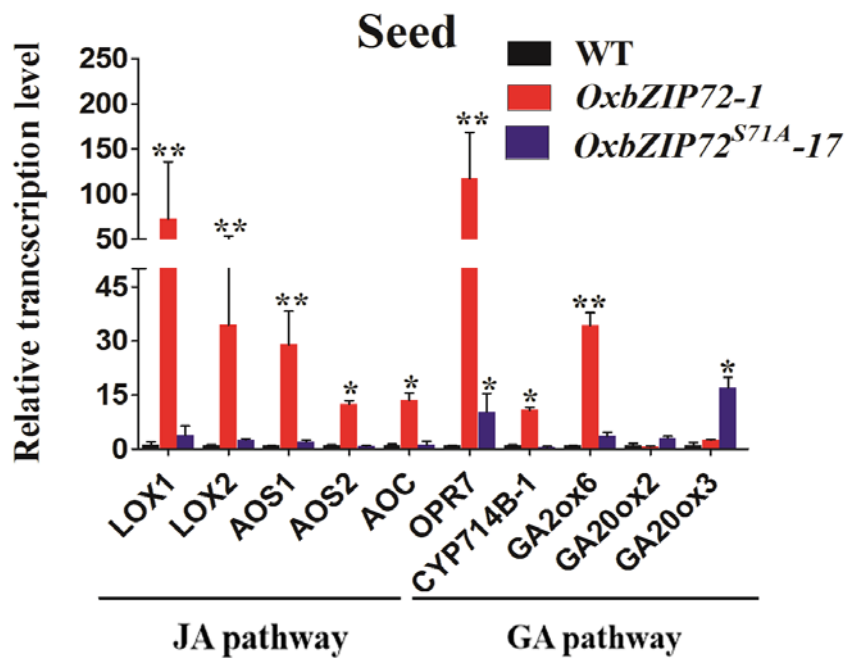

**Fig. S9** qRT-PCR analysis for transcript accumulation of JA and GA pathway genes in the seeds of the WT, *OxbZIP72* and *OxbZIP72<sup>S71A</sup>* transgenic lines. Seeds were grown on half-strength MS medium for 6 hours before harvest for total RNA isolation. Error bars indicate SD with biological triplicates (n=3). Asterisks indicate the significance of differences between the WT and transgenic lines as determined by Student's *t*-test analysis: \*P<0.05, \*\* P<0.01.

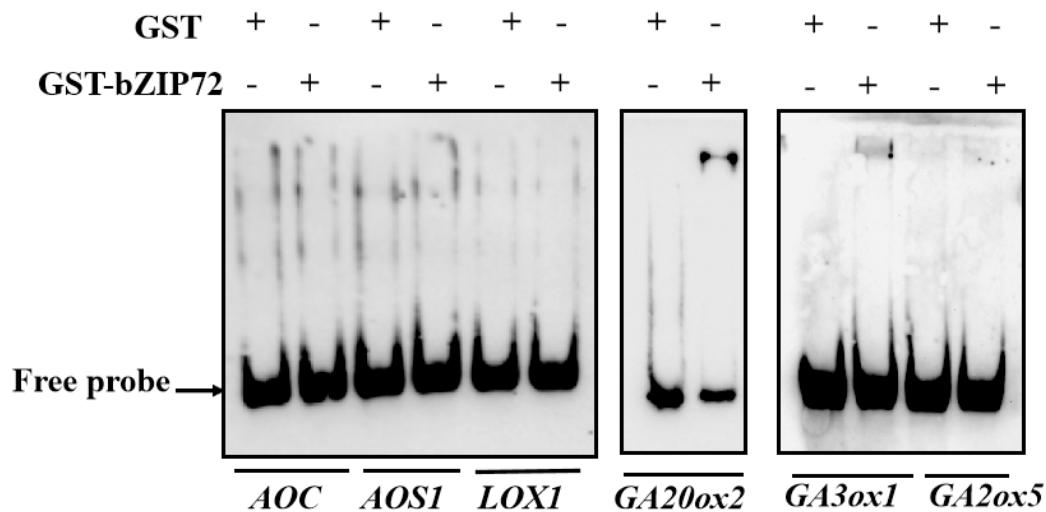

**Fig. S10** EMSA of bZIP72 on JA pathway genes *AOC*, *AOS1* and *LOX1* promoter regions and GA pathway genes *GA3ox1*, *GA2ox5* and *GA20ox2* promoter regions.

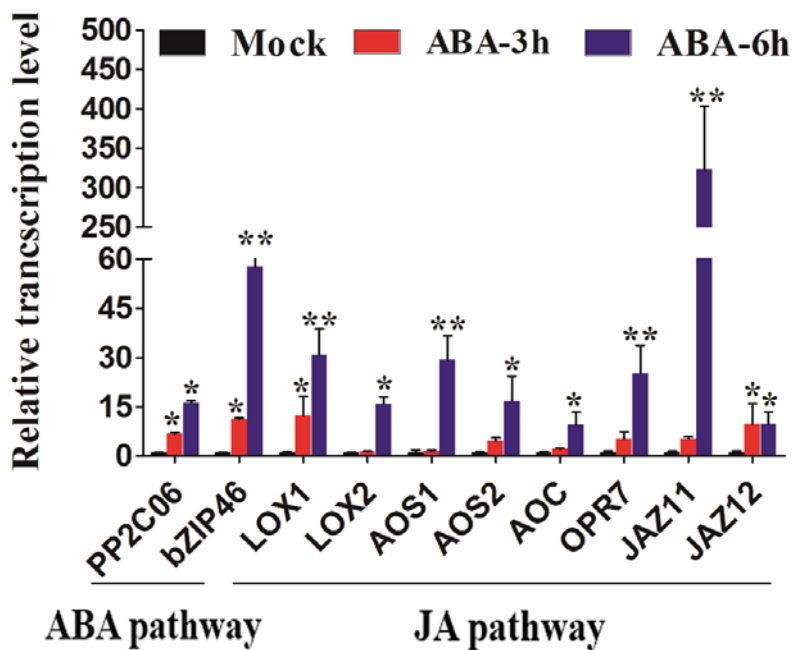

**Fig. S11** qRT-PCR analysis for transcript accumulation of ABA and JA pathway genes in the seeds of the WT. Seeds were grown on half-strength MS medium treated with 0 or 10  $\mu$ M ABA for 3 or 6 hours before harvest for total RNA isolation, respectively. Error bars indicate SD with biological triplicates (n=3). Asterisks indicate the significance of

differences between the mock-treated and ABA-treated seeds as determined by Student's *t*-test analysis: \* $P < 0.05$ , \*\*  $P < 0.01$ .

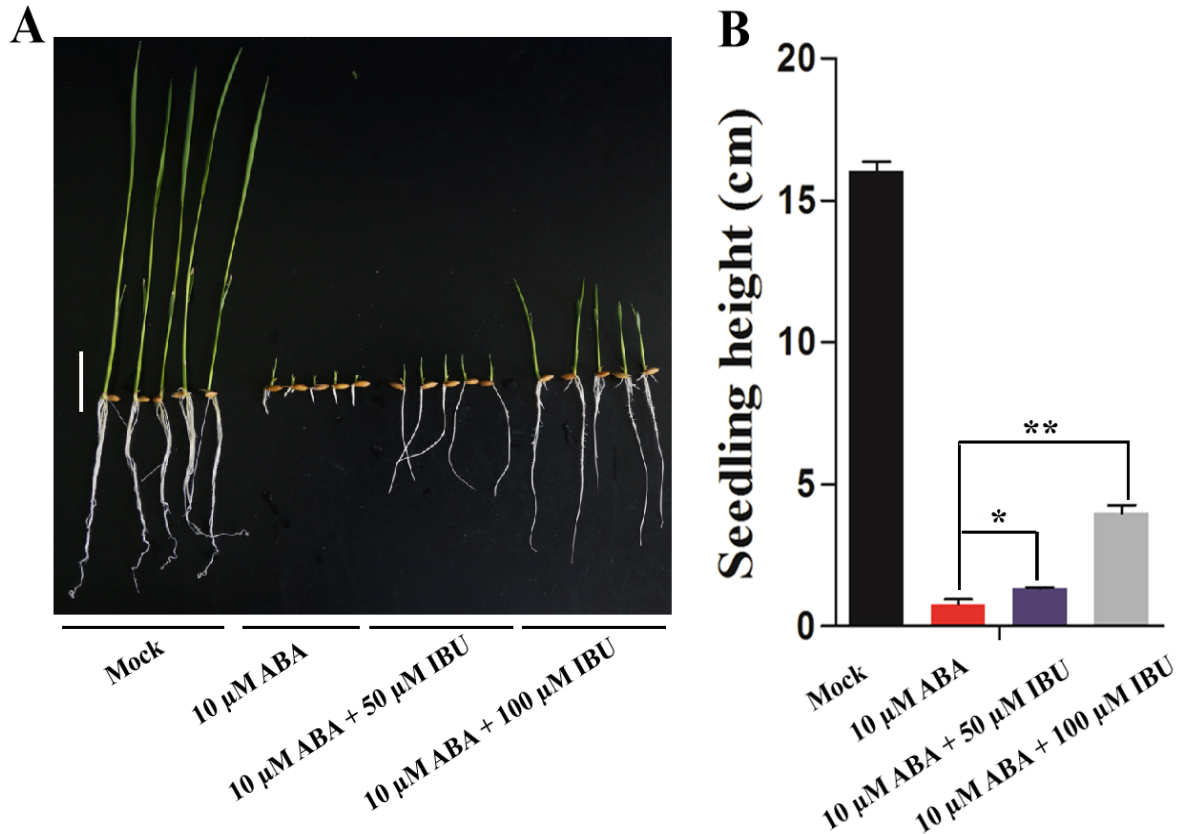

**Fig. S12** IBU relieved the inhibition of ABA on post-germination growth. (A) Growth phenotypes of the WT after grown in nutrient solution containing 0, 10  $\mu$ M ABA, 10  $\mu$ M ABA + 50  $\mu$ M IBU or 10  $\mu$ M ABA + 100  $\mu$ M IBU for 7 days, respectively. Bar= 2.5 cm. (B) Seedling heights of the WT in accordance to (A). IBU: Ibuprofen. Error bars indicate SD with 50 biological replicates ( $n=50$ ). Asterisks indicate the significance of differences between the ABA-treated seedlings and ABA+ IBU treated seedlings as determined by Student's *t*-test analysis: \* $P < 0.05$ , \*\*  $P < 0.01$ .

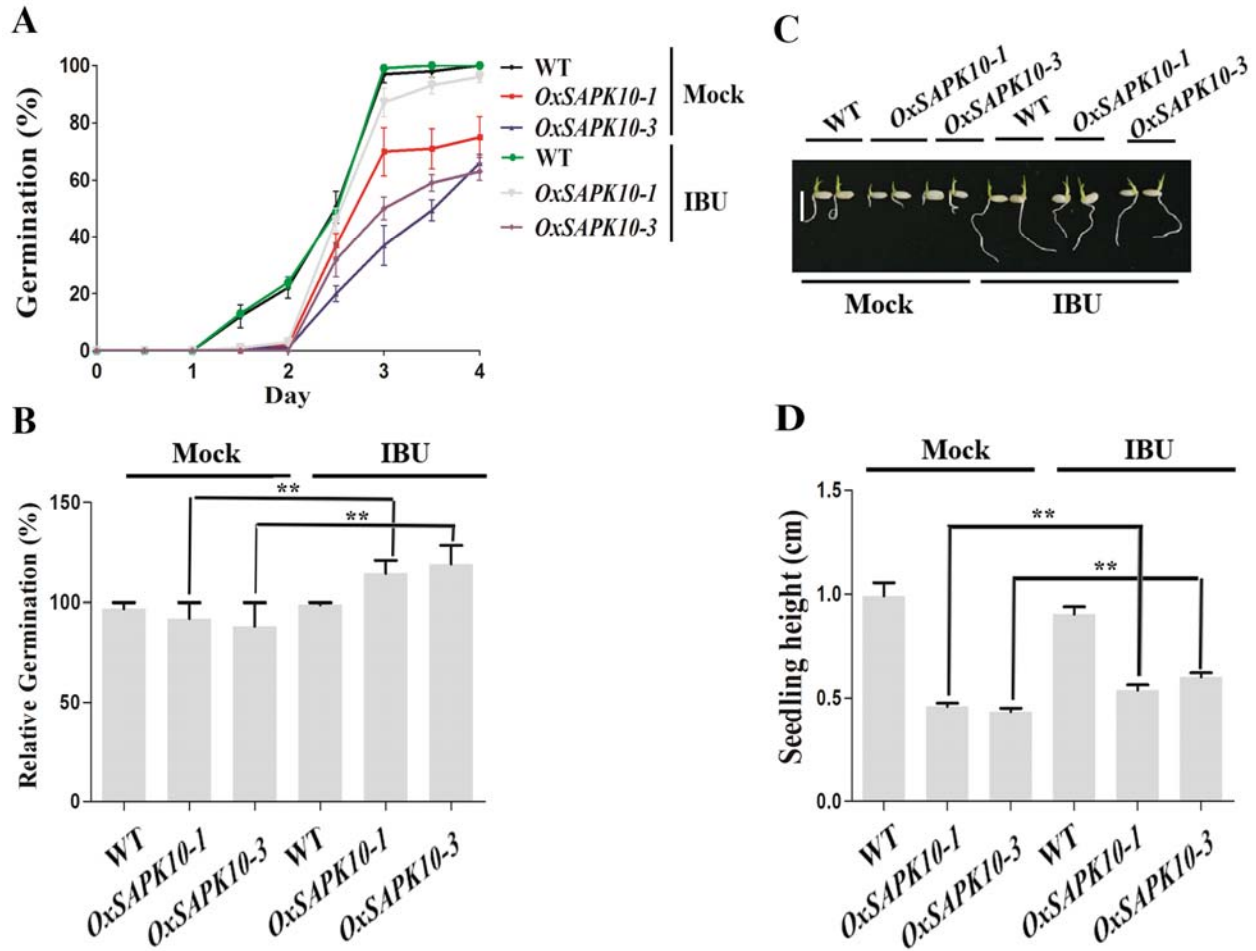

**Fig. S13** SAPK10-mediated retarded seed germination was relieved by exogenous IBU applied. (A) Germination time courses of the WT and *OxSAPK10* grown on half-strength MS medium under mock or 100  $\mu$ M IBU treatment, respectively. (B) The relative germination of the WT and *OxSAPK10* seeds under 100  $\mu$ M IBU treatment was determined after 4 days and expressed as a percentage of those grown on Mock condition. (C) Germination phenotypes of the WT and *OxSAPK10* treated with 0 or 100  $\mu$ M IBU, respectively. Photographs were taken on day 4. Bar=1cm. (D) Seedling heights of the WT and *OxSAPK10* in accordance to (C). Error bars indicate SD with biological triplicates (n=3, each replicates containing 50 seeds) in (A) and 50 biological replicates (n=50) in (D). Asterisks indicate the significance of differences between the mock and IBU treatment in (B and D) (Student's *t*-test analysis; \*\* P<0.01).
